# Supplementary material for: Phenotypic and Genotypic Characterization of Pan-Drug-Resistant Klebsiella pneumoniae Isolated in Qatar
Source: MDPI journal article supplement (doi:10.3390/antibiotics13030275), 2024-03-19
Supplement: s1 [file s1]

## Supplementary Materials

**Table S1.** Demographic, clinical characteristics and outcomes of three patients colonized or infected with PDR *K. pneumoniae*.

| Characteristics                                                           | KP1 (ST383)        | KP2 (ST231)         | KP3 (ST231)         |
|---------------------------------------------------------------------------|--------------------|---------------------|---------------------|
| Age                                                                       | 66                 | 51                  | 72                  |
| Gender                                                                    | Male               | Female              | Male                |
| Location                                                                  | Critical Care Unit | Critical Care Unit  | Critical Care Unit  |
| Isolation site                                                            | Urine tract        | Respiratory tract * | Respiratory tract * |
| Common associated underlying conditions                                   |                    |                     |                     |
| Extensive health care contact <sup>a</sup>                                | No                 | Yes                 | Yes                 |
| History of antibiotic exposure within 90 days prior to hospital admission | Yes                | Yes                 | Yes                 |
| Invasive devices <sup>b</sup>                                             | Yes                | Yes                 | No                  |
| Diabetes mellitus                                                         | Yes                | Yes                 | No                  |
| History of MDR infection or colonization within prior 90 days             | No                 | Yes                 | Yes                 |
| Co-infection with other microorganisms <sup>c</sup>                       | Yes                | Yes                 | No                  |
| Heart failure                                                             | Yes                | No                  | No                  |
| Chronic lung disease                                                      | No                 | No                  | Yes                 |
| Post-transplantation                                                      | No                 | Yes                 | Yes                 |
| Chronic liver disease                                                     | No                 | Yes                 | No                  |
| Acquisition                                                               | Hospital           | Hospital            | Hospital            |
| Disease evaluation                                                        | Colonization       | Colonization        | Sepsis              |

---

Antibiotic treatment

|                          |    |    |     |
|--------------------------|----|----|-----|
| Meropenem <sup>d</sup>   | No | No | Yes |
| Tigecycline <sup>e</sup> | No | No | Yes |
| Colistin nebulizer       | No | No | Yes |

---

Patients and pathogens identification: KP refer to patients 1,2 and 3 while ST refer to pathogens sequence types. <sup>a</sup> Extensive health care contact involves regular visits to outpatient medical facilities, a regular home visit by home care teams, hospitalization within the preceding 90 days, or residency in a long-term care facility. <sup>b</sup> Invasive devices involve central line, Foley's catheter, and tracheostomy. <sup>c</sup> Co-infection is associated with the following organisms: other strains of MDR *K. pneumonia* and MDR *Acinetobacter baumannii*. <sup>d</sup> High dose meropenem 2000 mg/mL IV. <sup>e</sup> High dose tigecycline 200 mg loading followed by 100 mg IV every 12 hours. \* Respiratory tract samples were tracheal aspirates
